# Supplementary material
Source: Research Square preprint supplement (doi:10.21203/rs.3.rs-8933926/v1)
Supplement: Supplementary file 1 [file 82c782470e1cae2341dc9a28.docx]

Table S1. Primer data statistics for *Nicotiana benthamiana.*

| Gene ID | Primer F（5’→3’) | Primer R（5’→3’) |
| --- | --- | --- |
| Peroxidas 10 | cctgacccgacactggattc | ggggcaaggttggaatctga |
| Kunitz-type | ccaagattccccgaagtgct | aggttaagtatacgccgccg |
| Denfensin | gccttaccaaaccaccatgc | gctgcagccaaagtttttgc |
| Cyclin-D3-2 | gctgctgtggcttgtctttc | tcttgcatcagcgacttgga |
| Terpenoid | gggtgctaccgaagaagagg | agttctccctttgagccgtg |
| Ans | gcccagaaagcaatcatggc | tggcctaaccataccaggga |
| NbWRKY40 | cttgctgcagccatttcagg | ctggtgtgcaggacttttgc |
| Ethylene | taaccccaagaagcgagcag | tagccgccatttctgcagaa |
| Inner | tcccctctgatgtcggaact | agtcctgttgcggaaaccaa |
| Actin | aagggatgcgaggatgga | caaggaaatcaccgctttgg |
| PVY-CP | gatgaatgggcttatggtttggtg | gatttgcctaagggttggtttcg |
| WRKYGFP | tatcggatccgaattcatggaattcacaagttttgttga | ccgcaagcttgtcgaccttgtacagctcgtccatgcc |


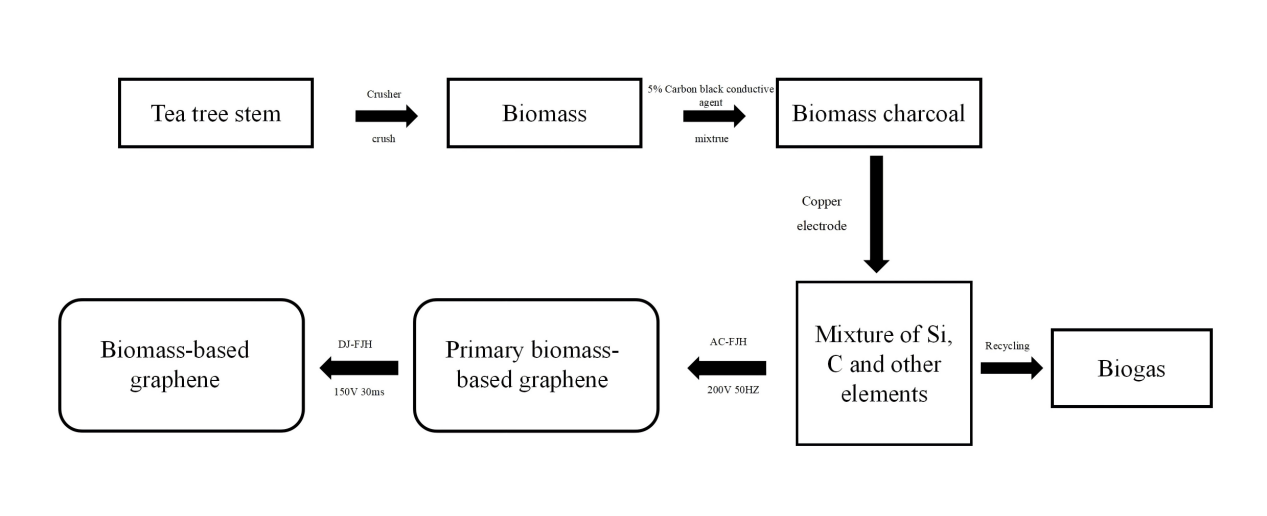


Fig. S1 The preparation method of FG.
